# Supplementary material
Source: HighWire-hosted journal article supplement (https://erj.ersjournals.com/content/58/2/2003005)
Supplement: inline-supplementary-material-1 [file inline-supplementary-material-1.pdf]

**Table S1**  
**Delta of pulmonary function tests and type of ILA according Fleischner**  
**classification in progressive individuals**

| <b>Subject</b> | <b>Delta<br/>FVC%<br/>predicted</b> | <b>Delta DLCO<br/>%<br/>predicted</b> | <b>Delta<br/>Meters<br/>6MWT</b> | <b>Fleischner*<br/>classification</b> |
|----------------|-------------------------------------|---------------------------------------|----------------------------------|---------------------------------------|
| 1              | -11                                 | - 15                                  | -20                              | SF                                    |
| 2              | -13                                 | -20                                   | -100                             | SNF                                   |
| 3              | -9                                  | -13                                   | -50                              | NSNF                                  |
| 4              | -10                                 | -21                                   | 0                                | NSNF                                  |
| 5              | -3                                  | -2                                    | -160                             | SF                                    |
| 6              | -6                                  | -13                                   | -290                             | NSNF                                  |
| 7              | -10                                 | -18                                   | 0                                | SNF                                   |
| 8              | -8                                  | -9                                    | -160                             | NSNF                                  |
| 9              | -12                                 | -22                                   | -68                              | SNF                                   |
| 10             | -6                                  | -6                                    | -160                             | NSNF                                  |
| 11             | -19                                 | 0                                     | 0                                | SNF                                   |
| 12             | -4                                  | -10                                   | -330                             | SF                                    |
| 13             | 0                                   | 0                                     | -50                              | SF                                    |
| 14             | -2                                  | -9                                    | -58                              | SNF                                   |
| 15             | 0                                   | -11                                   | -185                             | SF                                    |
| 16             | -6                                  | -5                                    | -200                             | NSNF                                  |
| 17             | -7                                  | -9                                    | -240                             | SNF                                   |
| 18             | 0                                   | -22                                   | -36                              | SF                                    |

\*SF= subpleural fibrotic, SNF= subpleural non-fibrotic, NSNF= non-subpleural non-fibrotic
