# Supplementary material
Source: HighWire-hosted journal article supplement (https://erj.ersjournals.com/content/58/2/2003005)
Supplement: inline-supplementary-material-2 [file inline-supplementary-material-2.pdf]

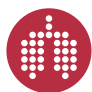

# Risk factors associated with the development of interstitial lung abnormalities

SHAREABLE PDF

Ivette Buendía-Roldán<sup>1,3</sup>, Rosario Fernandez<sup>1</sup>, Mayra Mejía<sup>1</sup>, Fortunato Juarez<sup>1</sup>, Gustavo Ramirez-Martinez<sup>1</sup>, Eduardo Montes<sup>1</sup>, Ana Karem S. Pruneda<sup>1</sup>, Karen Martinez-Espinosa<sup>1</sup>, Aime Alarcon-Dionet<sup>1</sup>, Iliana Herrera<sup>1</sup>, Carina Becerril<sup>1</sup>, Leslie Chavez-Galan<sup>1</sup>, Mario Preciado<sup>1</sup>, Annie Pardo<sup>2</sup> and Moisés Selman <sup>1,3</sup>

<sup>1</sup>Instituto Nacional de Enfermedades Respiratorias “Ismael Cosío Villegas”, Mexico City, Mexico. <sup>2</sup>Facultad de Ciencias, Universidad Nacional Autónoma de México, Mexico City, Mexico. <sup>3</sup>These two authors contributed equally to this article as lead authors and supervised the work.

Corresponding author: Moisés Selman ([mselman@yahoo.com.mx](mailto:mselman@yahoo.com.mx))

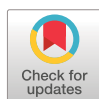

Shareable abstract (@ERSpublications)

Some individuals older than 50 years may present interstitial lung abnormalities which are associated with a greater risk of all-cause mortality. This study provides demographic and molecular factors which may help to identify individuals at higher risk. <https://bit.ly/2Lc4y88>

**Cite this article as:** Buendía-Roldán I, Fernandez R, Mejía M, *et al.* Risk factors associated with the development of interstitial lung abnormalities. *Eur Respir J* 2021; 58: 2003005 [DOI: 10.1183/13993003.03005-2020].

This single-page version can be shared freely online.

Copyright ©The authors 2021. For reproduction rights and permissions contact [permissions@ersnet.org](mailto:permissions@ersnet.org)

This article has supplementary material available from [erj.ersjournals.com](http://erj.ersjournals.com)

Received: 2 Aug 2020  
Accepted: 22 Dec 2020

## Abstract

**Background** Around 8–10% of individuals over 50 years of age present interstitial lung abnormalities (ILAs), but their risk factors are uncertain.

**Methods** From 817 individuals recruited in our lung ageing programme at the Mexican National Institute of Respiratory Diseases, 80 (9.7%) showed ILAs and were compared with 564 individuals of the same cohort with normal high-resolution computed tomography to evaluate demographic and functional differences, and with 80 individuals randomly selected from the same cohort for biomarkers. We evaluated *MUC5B* variant rs35705950, telomere length, and serum levels of matrix metalloproteinase (MMP)-1, MMP-2, MMP-3, MMP-7, MMP-8, MMP-9, MMP-12, MMP-13, interleukin (IL)-6, surfactant protein (SP)-D,  $\alpha$ -Klotho and resistin.

**Results** Individuals with ILAs were usually males ( $p<0.005$ ), older than controls ( $p<0.0001$ ), smokers ( $p=0.01$ ), with a greater frequency of *MUC5B* rs35705950 (OR 3.5, 95% CI 1.3–9.4;  $p=0.01$ ), and reduced diffusing capacity of the lung for carbon monoxide and oxygen saturation. Resistin, IL-6, SP-D, MMP-1, MMP-7 and MMP-13 were significantly increased in individuals with ILAs. Resistin ( $12\pm 5$  versus  $9\pm 4$  ng·mL<sup>-1</sup>;  $p=0.0005$ ) and MMP-13 ( $357\pm 143$  versus  $298\pm 116$  pg·mL<sup>-1</sup>;  $p=0.004$ ) were the most increased biomarkers. On follow-up (24±18 months), 18 individuals showed progression which was associated with gastro-oesophageal reflux disease (OR 4.1, 95% CI 1.2–12.9;  $p=0.02$ ) and in females with diabetes mellitus (OR 5.3, 95% CI 1.0–27.4;  $p=0.01$ ).

**Conclusions** Around 10% of respiratory asymptomatic individuals enrolled in our lung ageing programme show ILAs. Increased serum concentrations of pro-inflammatory molecules and MMPs are associated with ILAs.
